# Supplementary material for: Plasma biomarkers for Alzheimer’s disease: a field-test in a memory clinic
Source: HighWire-hosted journal article supplement (doi:10.1136/jnnp-2022-330619), 2023-04-03
Supplement: jnnp-2022-330619supp001_data_supplement.pdf [file jnnp-2022-330619supp001_data_supplement.pdf]

## Plasma biomarkers for Alzheimer's disease: a field-test in a memory clinic

Daniele Altomare\*, PhD; Sara Stampacchia\*, PhD; Federica Ribaldi, PhD; Szymon Tomczyk, PhD; Claire Chevalier, PhD; Géraldine Poulain, MS; Saina Asadi, MS; Bianca Bancila, MS; Moira Marizzoni, PhD; Marta Martins, MS; Aurelien Lathuiliere, MD, PhD; Max Scheffler, MD; Nicholas J. Ashton, PhD; Henrik Zetterberg, MD, PhD; Kaj Blennow, MD; Ilse Kern, MD, PhD; Miguel Frias, PhD; Valentina Garibotto, MD; Giovanni B. Frisoni, MD

\*These authors contributed equally to this work (shared first author).

### CONTENT

**Table S1.** Demographic and clinical features of each subsample of participants with biomarkers assessed through plasma and at least one traditional exam (i.e. PET, CSF, MRI, or FDG-PET).

**Figure S1.** Correlations between plasma and traditional amyloid biomarkers (i.e. amyloid-PET and CSF A $\beta$ <sub>42</sub>).

**Figure S2.** Correlations between plasma and traditional tau biomarkers (i.e. tau-PET and CSF p-tau<sub>181</sub>).

**Figure S3.** Correlations between plasma and traditional neurodegeneration biomarkers (i.e. hippocampal volume, and FDG-PET).

**Figure S4.** Diagnostic accuracy of plasma biomarkers over homologous traditional biomarkers.

**Figure S5.** Test-retest variability of plasma p-tau<sub>181</sub> and plasma NfL.

**Table S1.** Demographic and clinical features of each subsample of participants with biomarkers assessed through plasma and at least one traditional exam (i.e. PET, CSF, MRI, or FDG-PET).

| Demographic and clinical features | Traditional exams    |                  |                |                 |                |
|-----------------------------------|----------------------|------------------|----------------|-----------------|----------------|
|                                   | Amyloid-PET<br>n=142 | Tau-PET<br>n=105 | MRI<br>n=168   | FDG-PET<br>n=64 | CSF<br>n=51    |
| Age, years                        | 72 (9)               | 73 (9)           | 71 (12)        | 72 (9)          | 70 (10)        |
| Gender, males                     | 51% (72)             | 47% (49)         | 50% (84)       | 48% (31)        | 47% (24)       |
| Education, years                  | 14 (5)               | 14 (5)           | 15 (6)         | 14 (6)          | 15 (6)         |
| MMSE                              | 27 (4) [7]           | 27 (4) [8]       | 27 (4) [16]    | 25 (3) [3]      | 27 (4) [5]     |
| CDR                               | 0.5 (0.5) [19]       | 0.5 (0.1) [9]    | 0.5 (0.5) [39] | 0.5 (0.0) [7]   | 0.5 (0.1) [11] |
| Cognitive stage                   |                      |                  |                |                 |                |
| CU                                | 27% (39)             | 26% (27)         | 42% (71)       | 9% (6)          | 20% (10)       |
| MCI                               | 62% (88)             | 63% (66)         | 50% (84)       | 73% (47)        | 67% (34)       |
| Dementia                          | 11% (15)             | 11% (12)         | 8% (13)        | 17% (11)        | 14% (7)        |

PET: Positron Emission Tomography. CSF: cerebrospinal fluid. MRI: magnetic resonance imaging. FDG: 18F-fluorodeoxyglucose. MMSE: Mini-Mental State Examination. CDR: Clinical Dementia Rating. CU: cognitively unimpaired. MCI: mild cognitive impairment.

**Figure S1.** Correlations between plasma and traditional amyloid biomarkers (i.e. amyloid-PET and CSF A $\beta_{42}$ ).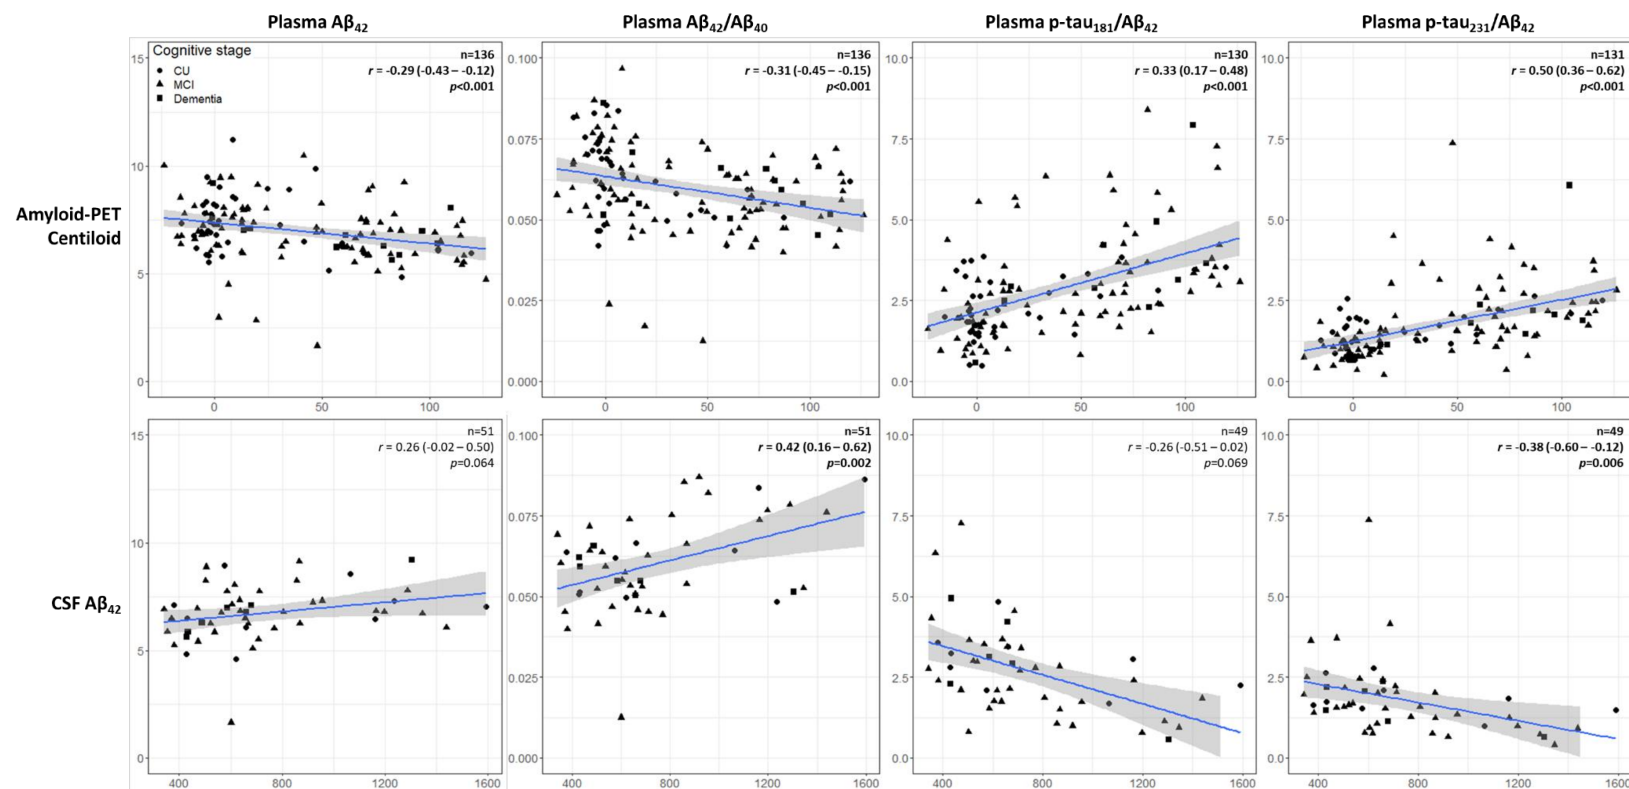

One plasma p-tau $_{181}/A\beta_{42}$  value (24.0) was not displayed to improve data visualization (but was included in the analyses). Pearson's  $r$  and its confidence intervals are reported for each correlation.

**Figure S2.** Correlations between plasma and traditional tau biomarkers (i.e. tau-PET and CSF p-tau<sub>181</sub>).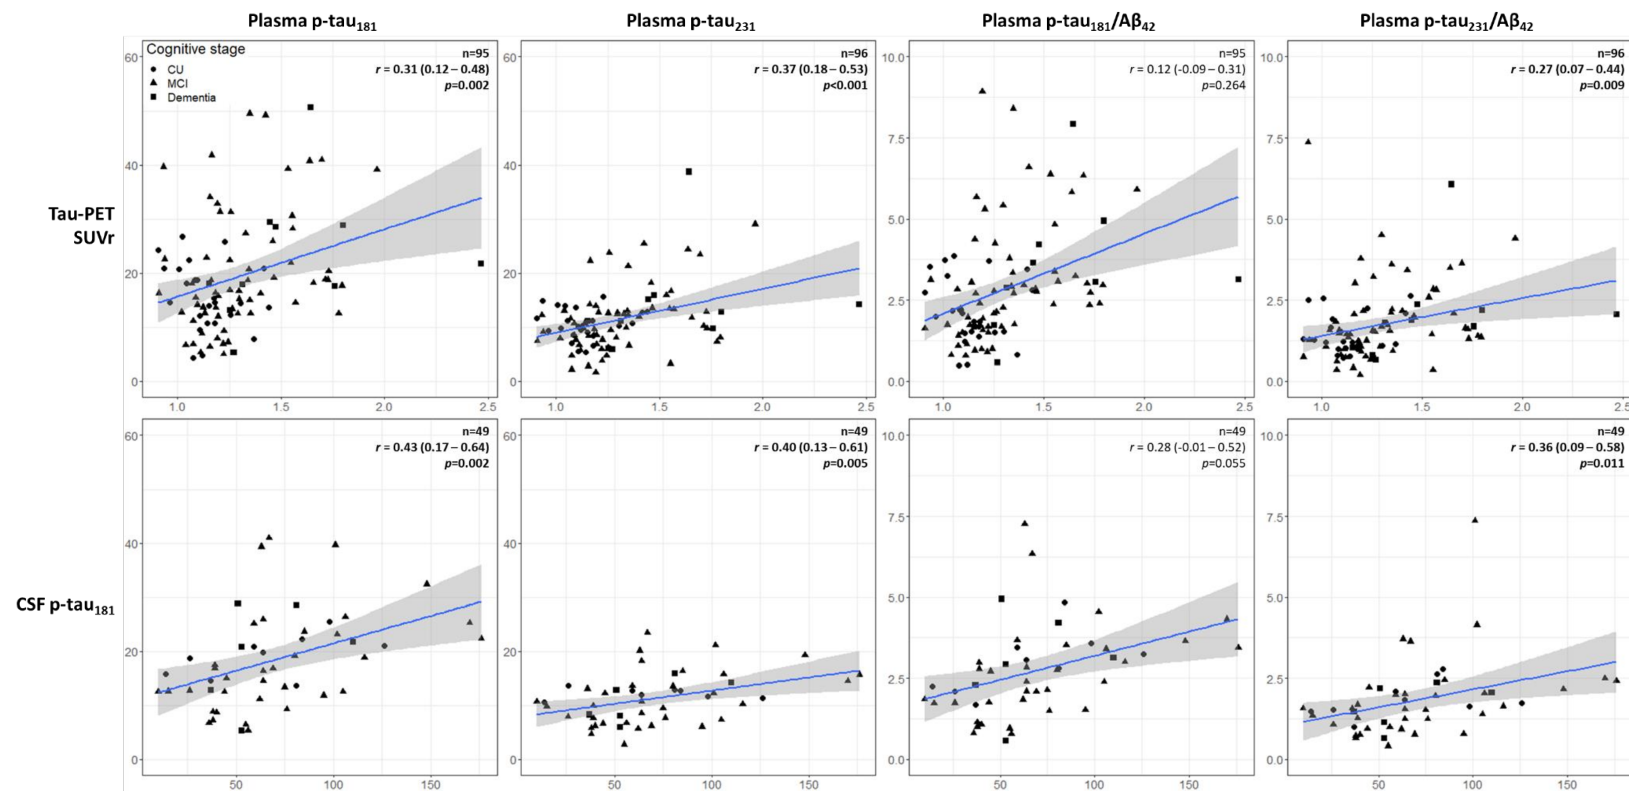

SUVr: standardized uptake value ratio.

One plasma p-tau<sub>181</sub>/Aβ<sub>42</sub> value (24.0) was not displayed to improve data visualization (but was included in the analyses). Pearson's *r* and its confidence intervals are reported for each correlation.



**Figure S3.** Correlations between plasma and traditional neurodegeneration biomarkers (i.e. hippocampal volume, and FDG-PET).

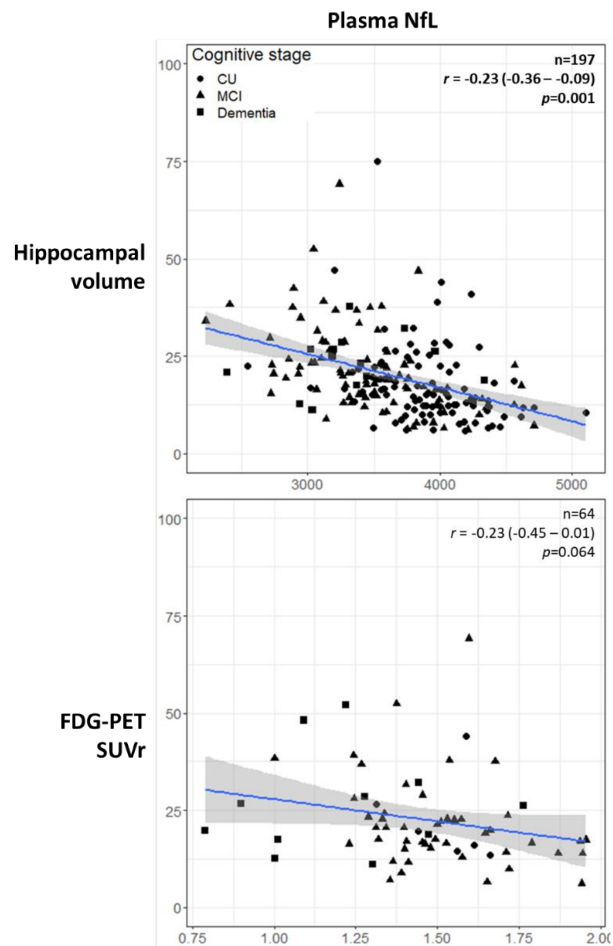

Two plasma NfL values (188.1 pg/ml and 260.1 pg/ml) were not displayed to improve data visualization (but were included in the analyses). Pearson's  $r$  and its confidence intervals are reported for each correlation.

**Figure S4.** Diagnostic accuracy of plasma biomarkers over homologous traditional biomarkers.

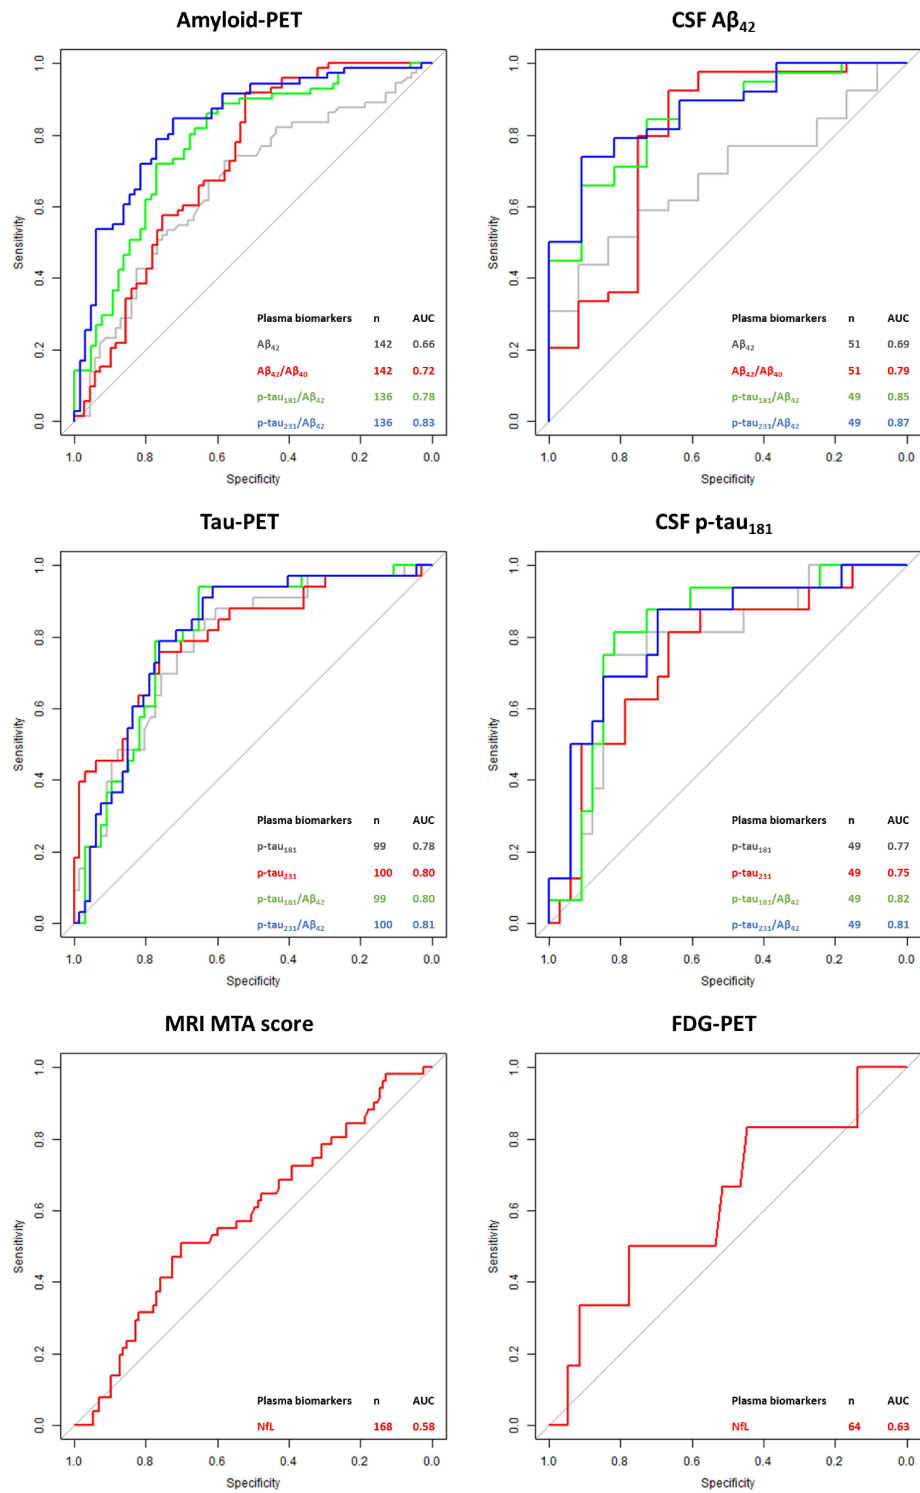

Amyloid-PET positivity: visual reading. CSF A $\beta$ <sub>42</sub> positivity: < 880.5 pg/ml.

Tau-PET positivity: Braak stages IV-VI. CSF p-tau<sub>181</sub> positivity: > 80.5 pg/ml.

MTA positivity: age-based cut-off. FDG-PET positivity: SUVR <1.21.

**Figure S5.** Test-retest variability of plasma p-tau<sub>181</sub> and plasma NfL.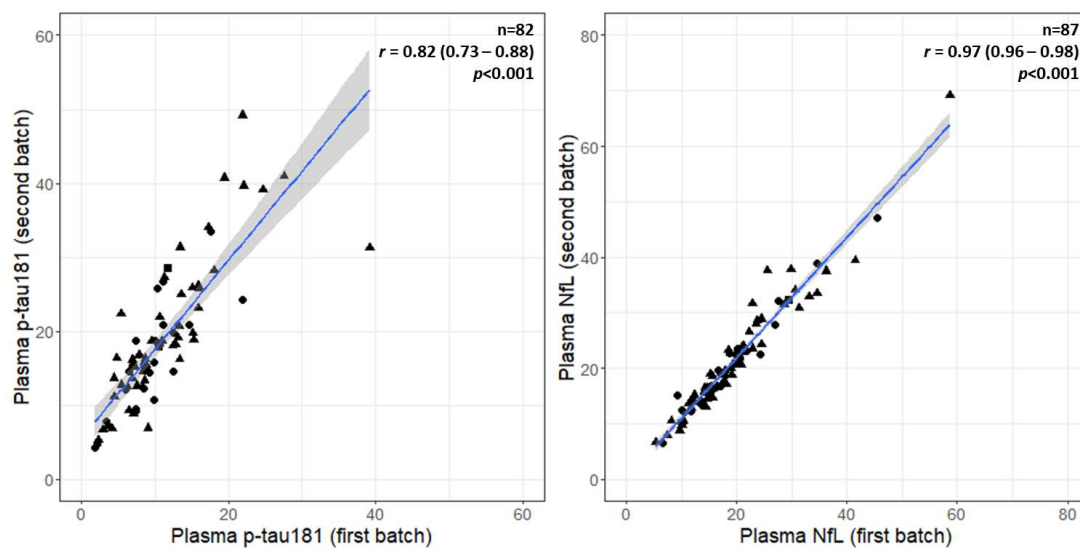

Pearson's  $r$  and its confidence intervals are reported for each correlation.
